# Supplementary material for: Custom design of solid–solid phase change material with ultra-high thermal stability for battery thermal management
Source: Royal Society of Chemistry journal article supplement (doi:10.1039/d0ta05247g), 2020-01-01
Supplement: d0ta05247g1.pdf [file d0ta05247g1.pdf]

## Electronic Supplementary Information†

### Custom design of solid-solid phase change material with ultra-high thermal stability for battery thermal management

Changren Xiao, Guoqing Zhang, Zhenghui Li, Xiaoqing Yang\*

*School of Materials and Energy, Guangdong University of Technology, Guangzhou 510006, PR China*

#### Experimental Section

*Fast-paced synthesis of SSPoPCM/EG-6%-10min:* 182.5 g octadecyl acrylate (OA), 3.5 g 1, 6-hexanediol diacrylate (HDDA), and 1.5 g benzoyl peroxide (BPO) were first added into a stainless-steel container successively, and then heated in a 50°C oil bath to form a clear solution. After that, 12 g EG (mass fraction of 6wt%), as the thermal conductive filler, was added into the solution with mechanical stirring until a homogeneous dispersive mixture was obtained. The homogeneous reactants prior to cross-linking were casted to a steel mold on the heating stage and the temperature of the stage was subsequently raised to 90°C for 10 minutes, during which a video was shot (Video S1). The thermo-physical properties of the obtained SSPoPCM/EG-6%-10min are shown in Table S2.

*Synthetic process of polymer phase change materials (PoPCM) with different dosages and types of crosslinkers:* Different crosslinkers of divinyl benzene (DVB), HDDA or diallyl terephthalate (DATP), BPO and monomer of OA were added into a three-neck flask at 50°C under magnetic stirring to obtain a clear solution. The solution was then heated to 90°C for 1 h to initiate and conduct the polymerization reaction. A series of PoPCMs with different molar ratios (crosslinker/monomer) of 1:20, 1:40 and 1:60 were

---

\* Corresponding author.  
E-mail address: [yangxiaoqing@gdut.edu.cn](mailto:yangxiaoqing@gdut.edu.cn) (X. Yang)

thus prepared. The specimen polymerized without crosslinkers was labelled as POA, and specimen polymerized with different crosslinkers at the optimal molar ratio, which exhibited the highest latent heat (phase change enthalpy,  $\Delta H_m$ ), was denoted as PoPCM-DVB, PoPCM-HDDA and PoPCM-DATP, respectively. Their corresponding DSC curves are shown in Figure S4.

*Preparation process of traditional PA/LDPE/EG ternary solid-liquid CPCM (SLPCM):* 538 g PA was melted in an 85°C-oil bath pot for 1 h. 50.5 g EG (6wt%) was added slowly into a stainless-steel vessel under continuous mechanical stirring. Then 251.5 g low-density polyethylene (LDPE) was added into the mixture and the temperature of the oil bath was raised to 145°C. After that, the molten composite was poured into the mold with various dimensions and then moved into an oven of 130°C for 0.5 h to eliminate the air bubbles existed. Subsequently, the resultant composite was cooled to room temperature naturally. This PA-based CPCM was denoted as SLPCM/EG-6% (Figure S3)<sup>1</sup>.

*Experiment setup of thermal resistance tests:* The diagram and digital graph of the experimental apparatus are shown in Figure S10 and S11 based on our previous reports<sup>2</sup>. A ceramic plate heater simulating the heat source, was attached to the surface of the aluminum substrate. The input powers of 3 and 6 W were supplied respectively from an independently controlled AC power unit. The whole aluminum substrate, except the upper surface, was insulated with thermal insulation material of melamine sponge with a low thermal conductivity, to minimize the thermal loss. To investigate the thermal resistance of different PCMs, the upper surface of the Al substrate was covered with SLPCM/EG-6% or SSPoPCM/EG-6% board, as physically displayed in Figure S10. The thermal conductive silicon grease was carefully applied to reduce the thermal contact resistance between the aluminum substrate and the PCM boards. Omega J-type thermocouples were placed to the central position of two opposite surfaces of the PCM board and the temperature was recorded by a Fluke data logger.

Figure

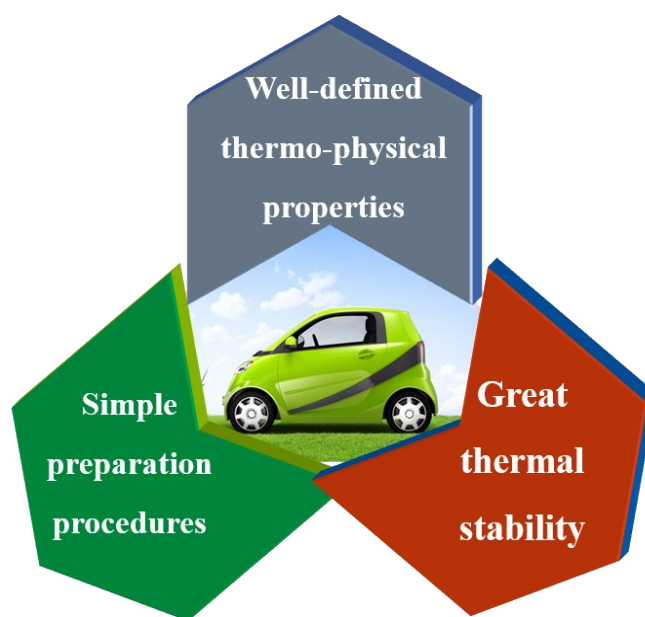

Figure S1. Three basic requirements for PCMs feasible in BTM application

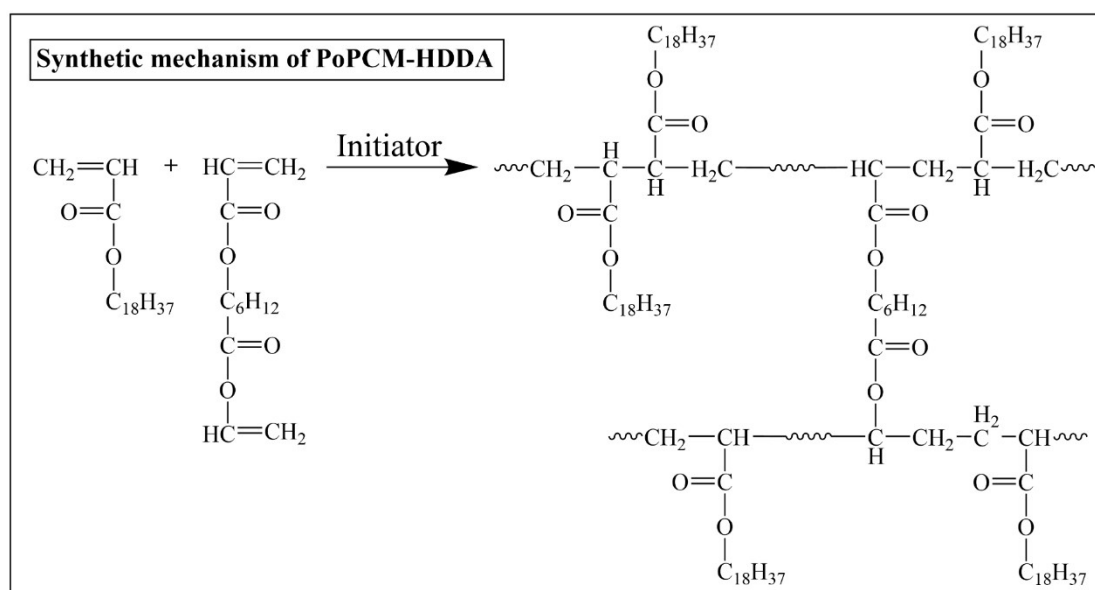

Figure S2. Synthetic mechanism of PoPCM using HDDA as the crosslinker

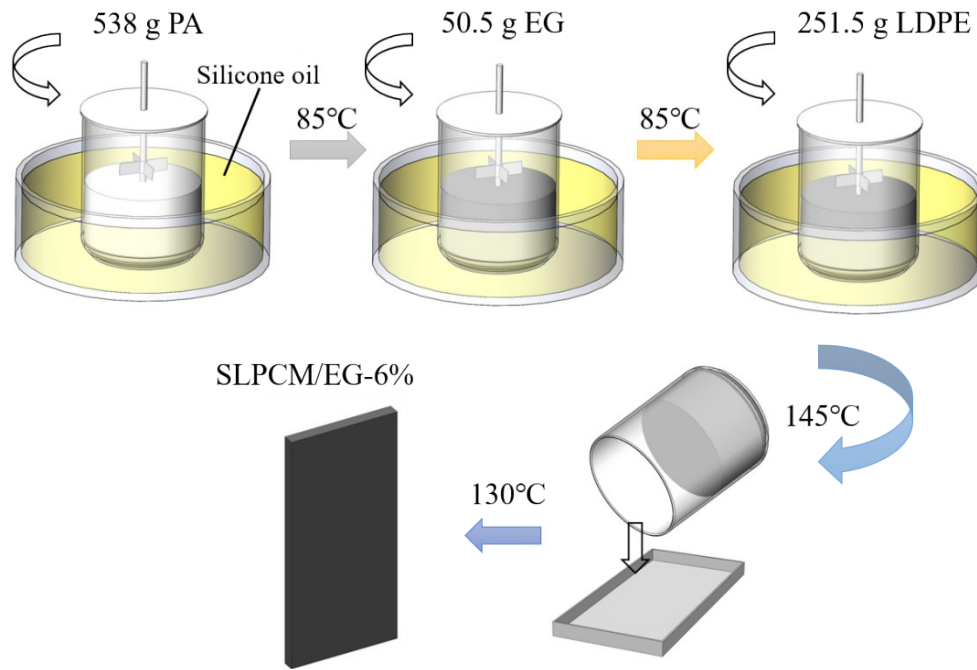

Figure S3. Preparation procedures of SLPCM/EG-6%

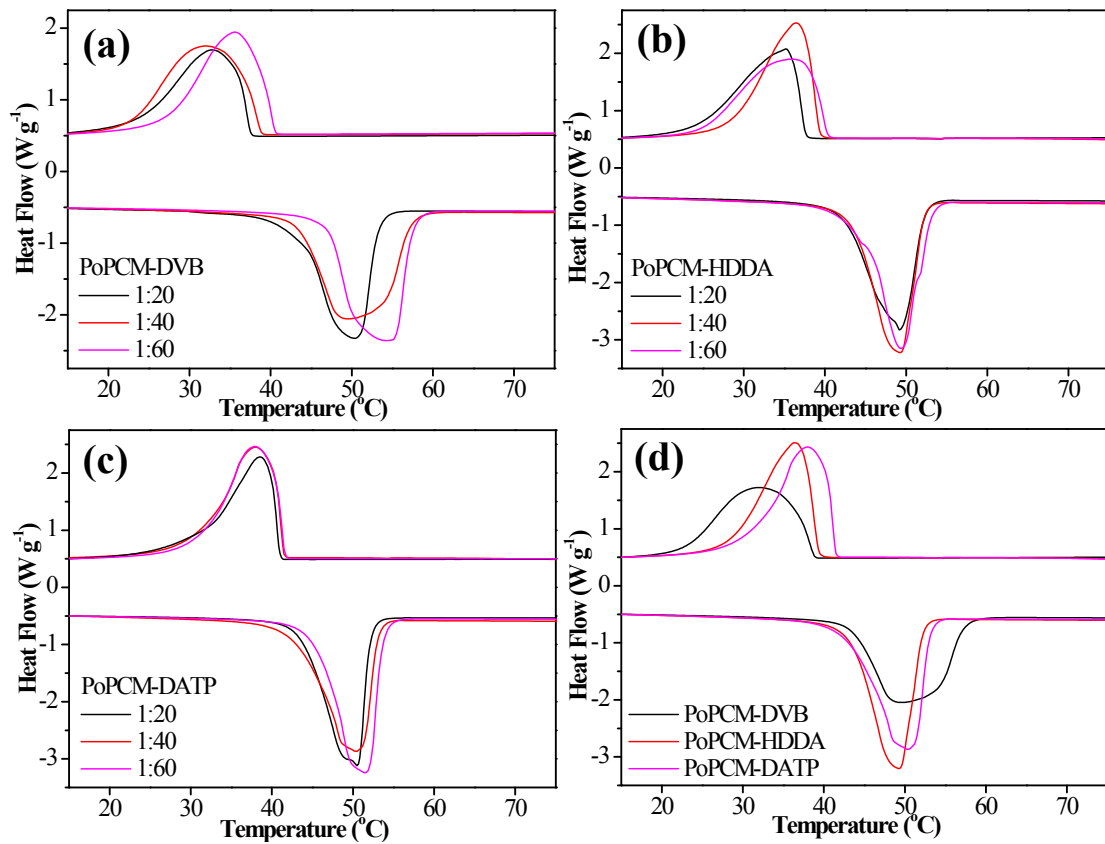

Figure S4. DSC curves of the PoPCMs synthesized using various dosages and types of crosslinkers.

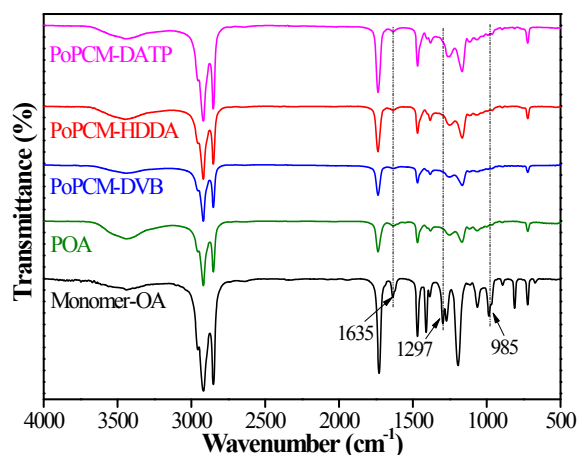

Figure S5. FTIR spectra of OA, POA, PoPCM-DVB, PoPCM-HDDA and PoPCM-DATP

As seen from the FTIR spectra from Figure S5, in all samples, the peaks at 2956, 2925 and 2855  $\text{cm}^{-1}$  are ascribed to the alkyl C-H stretching vibrations of the methyl and methylene groups. The peak at 1729  $\text{cm}^{-1}$  can be assigned to the C=O stretching vibration of the ester group, and the C-O stretching vibration of the ester group triggers intensive absorption peaks at 1269 and 1191  $\text{cm}^{-1}$ . The spectra also demonstrate an absorption peak at 721  $\text{cm}^{-1}$  corresponding to the in-plane rocking vibration of methylene derived from the stearyl (C18) groups. It is noted that after polymerization, the characteristic vibration peaks of C=C at 1635  $\text{cm}^{-1}$ , vinyl C-H at 1297  $\text{cm}^{-1}$  and 985  $\text{cm}^{-1}$  are absent, which reflects the successful synthesis of the 3D cross-linking structure with C18 side chains<sup>3</sup>.

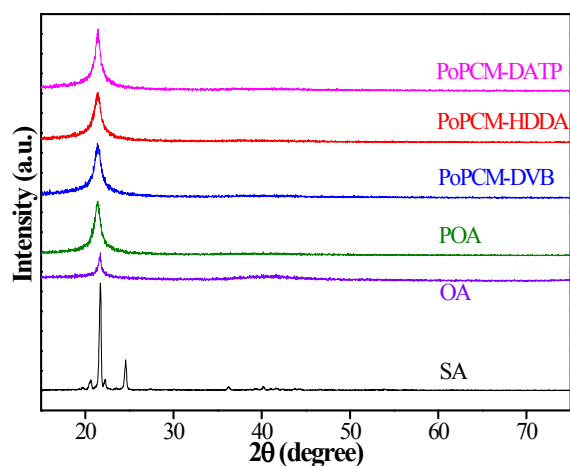

Figure S6. XRD patterns of SA (stearyl alcohol), OA, POA, PoPCM-DVB, PoPCM-HDDA and PoPCM-DATP

In the XRD patterns (Figure S6), all samples exhibit a similar intense diffraction peak at  $2\theta$  of around  $21.4^\circ$ , indicative of a good crystalline derived from the C18 group.

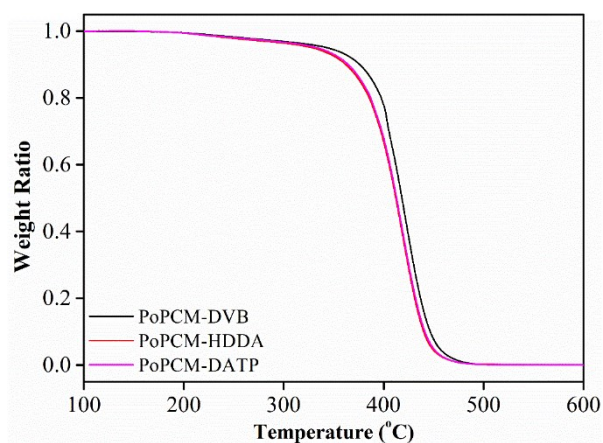

Figure S7. TG curves of PoPCM-DVB, PoPCM-HDDA, PoPCM-DATP in nitrogen atmosphere

As seen from Figure S7, large mass loss of all samples occurs after  $400^\circ\text{C}$  in nitrogen atmosphere, further confirming the ultra-high thermal stability of our conceived PoPCMs.

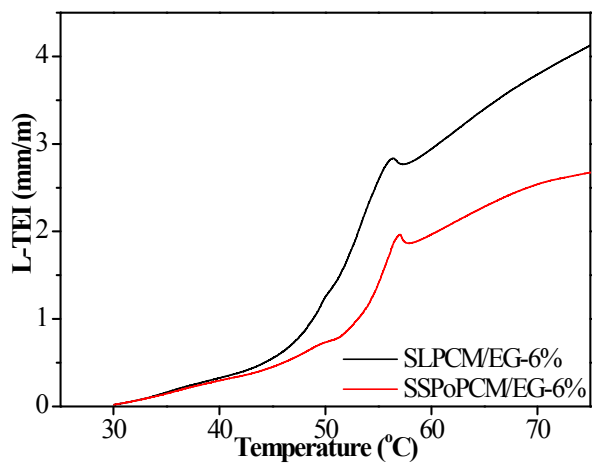

Figure S8. Linear thermal expansion increment (L-TEI) curves of SLPCM/EG-6% and SSPoPCM/EG-6%

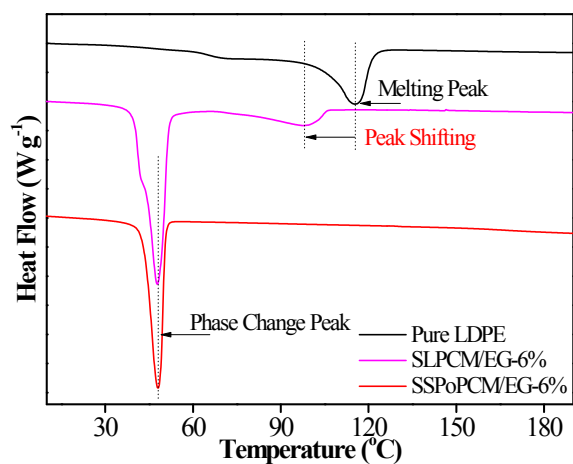

Figure S9. DSC curves of pure LDPE, SLPCM/EG-6% and SSPoPCM/EG-6%

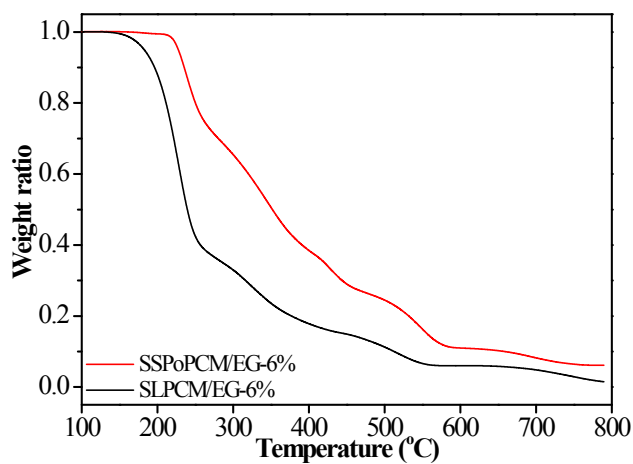

Figure S10. TG curves of SLPCM/EG-6% and SSPoPCM/EG-6%

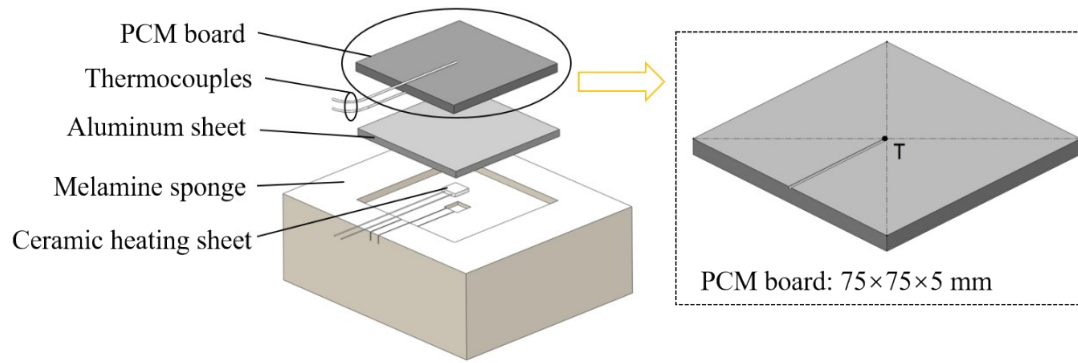

Figure S11. Experimental setup diagram of thermal resistance tests

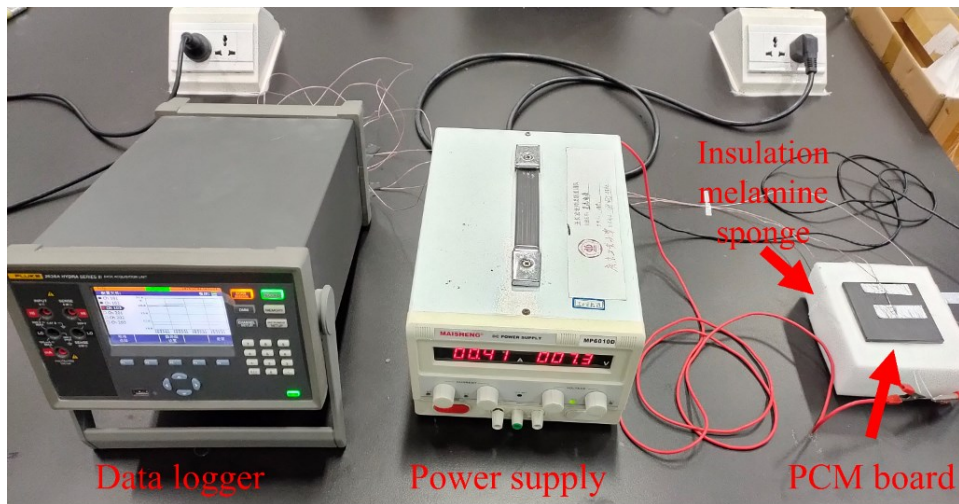

Figure S12. Digital graph of the experimental setup of thermal resistance tests



## Table

Table S1. Thermal conductivity of CPCMs with different kinds and contents of thermal conductive fillers

| CPCM composition | Thermal conductive ingredient (mass content) | Thermal conductivity ( $\text{W m}^{-1} \text{K}^{-1}$ ) | References |
|------------------|----------------------------------------------|----------------------------------------------------------|------------|
| PA/LDPE/EG       | EG (7wt%)                                    | 1.13                                                     | 4          |
| PA/LDPE/EG       | EG (7wt%)                                    | 1.38                                                     | 1          |
| PA/ER/EG/SiC     | EG (3wt%)/SiC (5wt%)                         | 1.31                                                     | 5          |
| PA/ER/EG/AlN     | EG (3wt%)/AlN (5wt%)                         | 1.13                                                     | 6          |
| PA/ER/EG         | EG (6wt%)                                    | 0.63                                                     | 7          |
| PA/GO            | GO (55wt%)                                   | 1.32                                                     | 8          |
| PA/OBC/EG        | EG (3wt%)                                    | 1.18                                                     | 9          |
| PA/EG            | EG (6wt%)                                    | 1.42                                                     | 10         |

Abbreviations: CPCM (composite phase change material); PA (paraffin); LDPE (low density polyethylene); EG (expanded graphite); ER (epoxy resin); SiC (silicon carbide); AlN (Aluminum nitride), GO (graphene oxide); OBC (olefin block copolymer)

Table S2. Thermo-physical properties of SSPoPCM/EG-6%-10min

| $T_{\text{mp}}$ ( $^{\circ}\text{C}$ ) | $\Delta H_{\text{m}}$ ( $\text{J g}^{-1}$ ) | Thermal conductivity ( $\text{W m}^{-1} \text{K}^{-1}$ ) |
|----------------------------------------|---------------------------------------------|----------------------------------------------------------|
| 46.8                                   | 92.4                                        | 2.29                                                     |

$T_{\text{mp}}$ : melting peak temperature;  $\Delta H_{\text{m}}$ : phase change enthalpy

Table S3. Basic parameters of the pouch cells

| Parameters               | Value           |
|--------------------------|-----------------|
| Quality (g)              | 299.0 $\pm$ 5.0 |
| Rated capacity (Ah)      | 16              |
| Rated voltage (V)        | 3.7             |
| Open-circuit voltage (V) | 4.2             |

Table S4. Parameters of the charge-discharge tests with different discharge rates

| Process                    | Time (min) | Current                  | Voltage                 |
|----------------------------|------------|--------------------------|-------------------------|
| Constant current charge    | -          | 8 A (0.5 C)              | Cut-off voltage of 21 V |
| Constant voltage charge    | -          | Cut-off current of 0.2 A | 21 V                    |
| Rest                       | 240        | -                        | -                       |
| Constant current discharge | -          | 16-80 A (1-5 C)          | Cut-off voltage of 15 V |
| Rest                       | 120        | -                        | -                       |

Table S5. Parameters of cyclic charge-discharge tests

| Process                    | Time (min) | Current                  | Voltage                 |
|----------------------------|------------|--------------------------|-------------------------|
| Constant current charge    | -          | 8 A (0.5 C)              | Cut-off voltage of 21 V |
| Constant voltage charge    | -          | Cut-off current of 0.2 A | 21 V                    |
| Rest                       | 30         | -                        | -                       |
| Constant current discharge | -          | 80 A (5 C)               | Cut-off voltage of 15 V |
| Rest                       | 30         | -                        | -                       |

Table S6. DSC data of different PoPCMs with various dosages and types of crosslinkers

| DVB/OA | $T_{mp}$ (°C) | $\Delta H_m$ (J g <sup>-1</sup> ) | HDDA/OA | $T_{mp}$ (°C) | $\Delta H_m$ (J g <sup>-1</sup> ) | DATP/OA | $T_{mp}$ (°C) | $\Delta H_m$ (J g <sup>-1</sup> ) |
|--------|---------------|-----------------------------------|---------|---------------|-----------------------------------|---------|---------------|-----------------------------------|
| 1:20   | 49.9          | 79.5                              | 1:20    | 48.7          | 91.6                              | 1:20    | 50.1          | 89.7                              |
| 1:40   | 49.1          | 92.5                              | 1:40    | 48.9          | 98.8                              | 1:40    | 49.9          | 98.6                              |
| 1:60   | 53.8          | 89.4                              | 1:60    | 48.8          | 92.3                              | 1:60    | 50.1          | 91.8                              |

$T_{mp}$ : phase change peak temperature

Table S7.  $\Delta H_m$  variation of SLPCM/EG-6% and SSPoPCM/EG-6% before and after 100 endothermic and exothermic cycles

| Samples       | $\Delta H_m(\text{J g}^{-1})$ |               |               |            |          |
|---------------|-------------------------------|---------------|---------------|------------|----------|
|               | Before                        | After cycling |               |            | Decline  |
|               | Cycling                       | Upper Surface | Lower Surface | Mean value | rate (%) |
| SLPCM/EG-6%   | 117.5                         | 98.7          | 103.5         | 101.1      | 14.0     |
| SSPoPCM/EG-6% | 91.3                          | 90.5          | 90.6          | 90.6       | -        |

Table S8. Thermal steady temperature and calculated thermal resistance of SLPCM/EG-6% and SSPoPCM/EG-6% boards at different power levels

| Power levels | Samples       | $T_{PCM-l}$<br>(°C) | $T_{PCM-u}$<br>(°C) | $T_{air}$ (°C) | $R_{PCM}$<br>(°C W <sup>-1</sup> ) | $R_{PCM-Air}$<br>(°C W <sup>-1</sup> ) | $R_{total}$<br>(°C W <sup>-1</sup> ) |
|--------------|---------------|---------------------|---------------------|----------------|------------------------------------|----------------------------------------|--------------------------------------|
| 3 W          | SLPCM/EG-6%   | 52.1                | 47.4                | 22.0           | 1.6                                | 8.5                                    | 10.1                                 |
|              | SSPoPCM/EG-6% | 49.2                | 46.7                | 22.2           | 0.8                                | 8.2                                    | 9.0                                  |
| 6 W          | SLPCM/EG-6%   | 77.6                | 66.5                | 21.8           | 1.9                                | 7.5                                    | 9.4                                  |
|              | SSPoPCM/EG-6% | 73.7                | 68.5                | 22.3           | 0.9                                | 7.7                                    | 8.6                                  |

Table S9.  $T_{max}$  and  $\Delta T_{max}$  of the SLPCM and SSPoPCM modules in odd-numbered cycles

| Cycle | SLPCM module |                  | SSPoPCM module |                  |
|-------|--------------|------------------|----------------|------------------|
|       | $T_{max}$    | $\Delta T_{max}$ | $T_{max}$      | $\Delta T_{max}$ |
| 1     | 46.6         | 4.3              | 44.8           | 3.2              |
| 3     | 46.9         | 4.1              | 45.4           | 3.0              |
| 5     | 46.9         | 4.1              | 45.1           | 3.1              |
| 7     | 46.8         | 4.1              | 45.1           | 3.0              |
| 9     | 46.9         | 4.1              | 45.3           | 3.0              |
| 11    | 46.7         | 4.1              | 45.3           | 3.1              |

|    |      |     |      |     |
|----|------|-----|------|-----|
| 13 | 46.9 | 4.1 | 45.0 | 3.0 |
| 15 | 46.8 | 4.0 | 45.1 | 3.1 |
| 17 | 46.9 | 4.1 | 45.2 | 3.1 |
| 19 | 46.7 | 4.0 | 45.3 | 3.0 |

---

## Reference

1. Y. F. Lv, X. Q. Yang, X. X. Li, G. Q. Zhang, Z. Y. Wang and C. Z. Yang, *Appl. Energy*, 2016, **178**, 376-382.
2. W. Wu, G. Zhang, X. Ke, X. Yang, Z. Wang and C. Liu, *Energy Convers. Manage.*, 2015, **101**, 278-284.
3. Y. Mao, J. Gong, M. Zhu and H. Ito, *Polym.*, 2018, **150**, 267-274.
4. Y. F. Lv, W. F. Situ, X. Q. Yang, G. Q. Zhang and Z. Y. Wang, *Energy Convers. Manage.*, 2018, **163**, 250-259.
5. W. Yuan, X. Yang, G. Zhang and X. Li, *Appl. Therm. Eng.*, 2018, **144**, 551-557.
6. J. Y. Zhang, X. X. Li, G. Q. Zhang, Y. Z. Wang, J. W. Guo, Y. Wang, Q. Q. Huang, C. R. Xiao and Z. D. Zhong, *Energy Convers. Manage.*, 2019, **245**, 112319.
7. J. He, X. Yang and G. Zhang, *Appl. Therm. Eng.*, 2019, **148**, 984-991.
8. M. Mehrali, S. T. Latibari, M. Mehrali, H. S. C. Metselaar and M. Silakhori, *Energy Convers. Manage.*, 2013, **67**, 275-282.
9. Y.-H. Huang, W.-L. Cheng and R. Zhao, *Energy Convers. Manage.*, 2019, **182**, 9-20.
10. F. He, X. Li, G. Zhang, G. Zhong and J. He, *Int. J. Energy Res.*, 2018, **42**, 3279-3288.
